# Supplementary material
Source: ML conference proceedings conference paper supplement (https://proceedings.mlr.press/v139/suzuki21a.html)
Supplement: Supplementary file 1 [file suzuki21a-supp.pdf]

## Supplementary Materials for Generalization Error Bound for Hyperbolic Ordinal Embedding

### A. Proof of Lemma 4

*Proof.* (The first equation) Let  $\mathbf{Z} := [\mathbf{z}_1 \ \mathbf{z}_2 \ \dots \ \mathbf{z}_N] \in \mathbb{R}^{D,N}$ , and  $\mathbf{Z} = \mathbf{U}\mathbf{\Sigma}\mathbf{V}^\top$  be the singular value decomposition of  $\mathbf{Z}$ . Regarding the Gramian matrix, we can obtain the singular value decomposition of  $\mathbf{G}$  as follows.

$$\begin{aligned} \mathbf{G} &= \mathbf{Z}^\top \mathbf{Z} \\ &= \mathbf{V}\mathbf{\Sigma}^\top \mathbf{U}^\top \mathbf{U}\mathbf{\Sigma}\mathbf{V}^\top \\ &= \mathbf{V}\mathbf{\Sigma}^2 \mathbf{V}^\top. \end{aligned} \quad (37)$$

Hence, we have  $\|\mathbf{G}\|_* = \text{Tr}(\mathbf{\Sigma}^2)$ . Therefore, we have that

$$\begin{aligned} \|\mathbf{G}\|_* &= \text{Tr}(\mathbf{\Sigma}^2) \\ &= \text{Tr}(\mathbf{\Sigma}^\top \mathbf{\Sigma} \mathbf{V}^\top \mathbf{V}) \\ &= \text{Tr}(\mathbf{V}\mathbf{\Sigma}\mathbf{U}^\top \mathbf{U}\mathbf{\Sigma}\mathbf{V}^\top) \\ &= \text{Tr}(\mathbf{Z}^\top \mathbf{Z}) \\ &= \text{Tr}(\mathbf{G}) \\ &= \sum_{n=1}^N [\mathbf{G}]_{n,n} \\ &= \sum_{n=1}^N \mathbf{z}_n^\top \mathbf{z}_n \\ &= \sum_{n=1}^N (\Delta_{\mathbb{R}^D}(\mathbf{0}, \mathbf{z}_n))^2, \end{aligned} \quad (38)$$

which completes the proof of the first equation.

(The second equation) For any  $i, j \in [N]$ , we have that

$$\begin{aligned} [\mathbf{G}]_{i,j} &= \mathbf{z}_i^\top \mathbf{z}_j \\ &\leq \|\mathbf{z}_i\|_2 \|\mathbf{z}_j\|_2 \\ &\leq \max \left\{ \|\mathbf{z}_i\|_2^2, \|\mathbf{z}_j\|_2^2 \right\} \\ &\leq \max_{n \in [N]} \|\mathbf{z}_n\|_2^2 \\ &= \max_{n \in [N]} [\mathbf{G}]_{n,n} \\ &\leq \max_{n \in [N]} (\Delta_{\mathbb{R}^D}(\mathbf{0}, \mathbf{z}_n))^2, \end{aligned} \quad (39)$$

where the first inequality holds from the Cauchy Schwartz inequality. Hence, we have  $\max_{i,j \in [N]} [\mathbf{G}]_{i,j} \leq \max_{n \in [N]} [\mathbf{G}]_{n,n}$ . Conversely, obviously,  $\max_{i,j \in [N]} [\mathbf{G}]_{i,j} \geq \max_{n \in [N]} [\mathbf{G}]_{n,n}$  is valid. Therefore, we have that  $\max_{i,j \in [N]} [\mathbf{G}]_{i,j} = \max_{n \in [N]} [\mathbf{G}]_{n,n}$ . Since the left hand side equals  $\|\mathbf{G}\|_{\max}$ ,

and right hand side equals  $\max_{n \in [N]} (\Delta_{\mathbb{R}^D}(\mathbf{0}, \mathbf{z}_n))^2$ , we have that  $\|\mathbf{G}\|_{\max} = \max_{n \in [N]} (\Delta_{\mathbb{R}^D}(\mathbf{0}, \mathbf{z}_n))^2$ , which completes the proof of the second equation.  $\square$

### B. Proof of Lemma 6

*Proof.* Define

$$\begin{aligned} \mu &:= \min \{ \Delta^*(i, j) \mid i \neq j \}, \\ \xi &:= \min \left\{ \left| 1 - \frac{\Delta^*(i, j)}{\Delta^*(i', j')} \right| \mid \begin{array}{l} (i, j), (i', j') \in [N] \times [N], \\ i \neq j, i' \neq j', (i, j) \neq (i', j') \end{array} \right\}. \end{aligned} \quad (40)$$

We assume that  $\mu, \xi > 0$  holds as in the discussion in Section 2.1. Let  $\epsilon := \frac{1}{3}\xi$ . Let  $\nu, \eta_{\max}$  be the constants determined on the weighted graph defined by (Sarkar, 2011). Let  $\tau := \max \left\{ \eta_{\max}, \frac{\nu(1+\epsilon)}{\mu\epsilon}, \frac{1}{\mu\epsilon} \right\}$ . Then by the  $(1+\epsilon)$ -distortion algorithm, we can obtain representations  $\mathbf{z}_1, \mathbf{z}_2, \dots, \mathbf{z}_N \in \mathbb{L}^2$  such that

$$(1-\epsilon)\tau\Delta^*(i, j) < \Delta_{\mathbb{L}^2}(\mathbf{z}_i, \mathbf{z}_j) \leq (1+\epsilon)\tau\Delta^*(i, j), \quad (41)$$

for any  $i, j \in [N]$ . Here, the following is valid for  $i, j, i', j' \in [N]$ : if  $\Delta^*(i, j) > \Delta^*(i', j')$ , then

$$\begin{aligned} &\Delta_{\mathbb{L}^2}(\mathbf{z}_i, \mathbf{z}_j) - \Delta_{\mathbb{L}^2}(\mathbf{z}_{i'}, \mathbf{z}_{j'}) \\ &\geq \tau(1-\epsilon)\Delta^*(i, j) - (1+\epsilon)\Delta^*(i', j') \\ &\geq \tau\Delta^*(i, j) \left[ (1-\epsilon) - (1+\epsilon) \frac{\Delta^*(i', j')}{\Delta^*(i, j)} \right] \\ &\geq \tau\Delta^*(i, j) \left[ \left(1 - \frac{1}{3}\xi\right) - \left(1 + \frac{1}{3}\xi\right)(1-\xi) \right] \\ &> \tau\Delta^*(i, j) \frac{1}{3}\xi \\ &\geq \tau\mu\epsilon \\ &\geq 1. \end{aligned} \quad (42)$$

$\square$

### C. Proof of Lemma 7

*Proof.* Let  $c$  be the center of the 6-star subgraph and  $n_1, n_2, \dots, n_6$  be its neighborhood. Define  $\Delta_m^* := \Delta^*(c, n_m)$ . Let  $B_\Delta(\mathbf{z})$  be an open ball of radius  $\Delta$  centered at  $\mathbf{z}$  in  $\mathbb{R}^2$ . Assume that  $\mathbf{z}_c, \mathbf{z}_{n_1}, \dots, \mathbf{z}_{n_6} \in \mathbb{R}^2$  satisfies (2) and define  $\Delta_m := \Delta_{\mathbb{R}^2}(\mathbf{z}_c, \mathbf{z}_{n_m})$ . For  $m, m'$  such that  $\Delta_m^* < \Delta_{m'}^*$ ,  $\mathbf{z}_{n_m} \in B_{\Delta_{m'}}(\mathbf{z}_c)$  and  $\mathbf{z}_{n_{m'}} \notin B_{\Delta_m}(\mathbf{z}_{n_m})$ ,

are necessary. Hence,  $\angle z_{n_m} z_c z_{n_m'} > 60^\circ$ . Thus, segments  $z_c z_{n_1}, z_c z_{n_2}, \dots, z_c z_{n_6}$  partition  $360^\circ$  into 6 angles larger than  $60^\circ$ , which is contradiction.  $\square$

## D. Proof of Proposition 8

*Proof.* If  $a, b, c > 0$  and assume  $x > 0$ , then we have that

$$ax^2 + bx < c \Leftrightarrow 0 < x < -b + \sqrt{b^2 + 4ac}. \quad (43)$$

We are going to find  $S$  that satisfies

$$\begin{aligned} & O\left(L_\phi(\exp R)^2 \left(\sqrt{\frac{N \ln N}{S}} + \frac{N \ln N}{S} + \sqrt{\frac{\ln \frac{2}{\delta}}{S}}\right)\right) \\ & < 2\alpha \frac{V_{\min}^{\mathbb{R}^2}}{|\mathcal{T}|}, \end{aligned} \quad (44)$$

where  $L_\phi = 1$ . This corresponds to  $x = \frac{1}{\sqrt{S}}$ ,  $a = O(N \ln N)$ ,  $b = O\left(\sqrt{N \ln N} + \sqrt{\ln \frac{2}{\delta}}\right)$ ,  $c = O\left(\frac{2\alpha V_{\min}^{\mathbb{R}^2}}{(\exp R)^2 |\mathcal{T}|}\right)$ . We can formulate the condition as follows:

$$\begin{aligned} 0 < \frac{1}{\sqrt{S}} < -b + \sqrt{b^2 + 4ac} \\ \Leftrightarrow S > \frac{1}{(-b + \sqrt{b^2 + 4ac})^2}. \end{aligned} \quad (45)$$

Here, we have that

$$\begin{aligned} & \frac{1}{(-b + \sqrt{b^2 + 4ac})^2} \\ & = \frac{(b + \sqrt{b^2 + 4ac})^2}{(4ac)^2} \\ & \leq \frac{(b + b(1 + \frac{2ac}{b^2}))^2}{(4ac)^2} \\ & = \left(\frac{b(2 + \frac{2ac}{b^2})}{4ac}\right)^2 \\ & = \left(\frac{b}{2ac} + \frac{1}{2b}\right)^2 \\ & \leq \left(\frac{b}{2ac} + \frac{1}{2b}\right)^2 \\ & = O\left(\frac{(\exp R)^2 |\mathcal{T}|}{\alpha V_{\min}^{\mathbb{R}^2} N \ln N} \left(\sqrt{N \ln N} + \sqrt{\ln \frac{2}{\delta}}\right) \right. \\ & \quad \left. + \frac{1}{\sqrt{N \ln N} + \sqrt{\ln \frac{2}{\delta}}}\right)^2, \end{aligned} \quad (46)$$

which completes the proof. Here, the first inequality holds since  $\sqrt{1+y} \leq 1 + \frac{1}{2}y$ .  $\square$

## E. Proof of Lemma 9

*Proof.* The statement (iv) follows from (ii) and (iii). Therefore, we prove (i)-(iii) in the following.

(Sufficiency) (i) Assume that  $(z_n)_{n=1}^N \in (\mathbb{L}^D)^N$  is valid. For  $d = 0, 1, \dots, D$  and  $n = 1, 2, \dots, N$ , we denote the  $d$ -th element of  $z_n \in \mathbb{L}^D$  by  $z_{d,n}$ , and for  $n = 1, 2, \dots, N$ , we define  $z_n^- \in \mathbb{R}^1$  and  $z_n^+ \in \mathbb{R}^1$  by

$$z_n^- := [z_{0,n}], z_n^+ := [z_{1,n} \ z_{2,n} \ \dots \ z_{D,n}]^\top. \quad (47)$$

Also, we define  $Z^- \in \mathbb{R}^{1,N}$  and  $Z^+ \in \mathbb{R}^{D-1,N}$  by

$$\begin{aligned} Z^- &:= [z_1^- \ z_2^- \ \dots \ z_N^-], \\ Z^+ &:= [z_1^+ \ z_2^+ \ \dots \ z_N^+], \end{aligned} \quad (48)$$

respectively. Define  $L^-, L^+ \in \mathbb{R}^{N,N}$  by  $L^- := (Z^-)^\top Z^-$  and  $L^+ := (Z^+)^\top Z^+$ , respectively. For all  $x \in \mathbb{R}^N$ ,  $x^\top L^- x = (L^- x)^\top L^- x \geq 0$ . Therefore, we have  $L^- \succeq \mathbf{O}$ . Likewise,  $L^+ \succeq \mathbf{O}$  is valid, and thus we obtain (a). Because  $Z^- \in \mathbb{R}^{1,N}$  and  $Z^+ \in \mathbb{R}^{D-1,N}$ , we have  $\text{rank } L^- = 1$  and  $\text{rank } L^+ \leq D$ , respectively. As  $z_n \in \mathbb{L}^D$ ,  $z_{0,n} \geq 1$  is valid,  $\text{rank } L^- \neq 0$ , and therefore  $\text{rank } L^- = 1$ . Thus, we have (b). If  $i, j \in [N]$ , then the following inequality holds:

$$\begin{aligned} & [L^+ - L^-]_{i,j} \\ & = (z_i^+)^\top z_j^+ - (z_i^-)^\top z_j^- \\ & = (z_i^+)^\top z_j^+ - \sqrt{1 + (z_i^+)^\top (z_i^+)} \sqrt{1 + (z_j^+)^\top (z_j^+)} \\ & = (z_i^+)^\top z_j^+ - \left\| \begin{bmatrix} 1 & (z_i^+)^\top \end{bmatrix} \right\|_2 \left\| \begin{bmatrix} 1 & (z_j^+)^\top \end{bmatrix} \right\|_2 \\ & \leq (z_i^+)^\top z_j^+ - \begin{bmatrix} 1 & (z_i^+)^\top \end{bmatrix} \begin{bmatrix} 1 & (z_j^+)^\top \end{bmatrix}^\top \\ & = 1, \end{aligned} \quad (49)$$

where the inequality comes from the Cauchy Schwarz inequality, and the equality holds if  $i = j$ . These imply (c) and (d), which completes the proof of the sufficiency in (i).

(ii) Assume  $(z_n)_{n=1}^N \in \mathcal{B}_R$ , that is, for all  $n \in [N]$ ,  $\Delta_{\mathbb{L}^D}(z_0, z_n) \leq R$  is valid. Since  $\mathcal{B}_R \subset \mathbb{L}^D$ , conditions (a)-(d) holds true from the above discussion. Since  $\Delta_{\mathbb{L}^D}(z_0, z_n) = \text{arcosh}(-\langle z_0, z_n \rangle_M) = \text{arcosh}(z_{0,n}) = \text{arcosh}\left(\sqrt{1 + (z_n^+)^\top z_n^+}\right)$ , the followings are valid:

$$\begin{aligned} (z_n^-)^\top z_n^- &= (z_{0,n})^2 = \cosh^2 \Delta_{\mathbb{L}^D}(z_0, z_n), \\ (z_n^+)^\top z_n^+ &= 1 + \cosh^2 \Delta_{\mathbb{L}^D}(z_0, z_n) = \sinh^2 \Delta_{\mathbb{L}^D}(z_0, z_n). \end{aligned} \quad (50)$$

Therefore, we have

$$\begin{aligned} [\mathbf{L}^-]_{n,n} &= (\mathbf{z}_n^-)^\top \mathbf{z}_n^- \leq \cosh^2 R \\ [\mathbf{L}^+]_{n,n} &= (\mathbf{z}_n^+)^\top \mathbf{z}_n^+ \leq \sinh^2 R. \end{aligned} \quad (51)$$

For all  $i, j \in [N]$ ,

$$\begin{aligned} [\mathbf{L}^-]_{i,j} &= (\mathbf{z}_i^-)^\top \mathbf{z}_j^- \\ &\leq \|\mathbf{z}_i^-\|_2 \|\mathbf{z}_j^-\|_2 \\ &\leq \max_{n=i,j} \left\{ (\mathbf{z}_n^-)^\top \mathbf{z}_n^- \right\} \\ &\leq \max_{n \in [N]} \left\{ (\mathbf{z}_n^-)^\top \mathbf{z}_n^- \right\} \\ &\leq \cosh^2 R \end{aligned} \quad (52)$$

is valid, where the first inequality is from the Cauchy Schwarz inequality. Thus, we have  $\|\mathbf{L}^-\|_{\max} \leq \cosh^2 R$ , and likewise, we also have  $\|\mathbf{L}^+\|_{\max} \leq \sinh^2 R$ , which imply condition (e). We have proved the sufficiency in (ii).

(iii) If  $(\mathbf{z}_n)_{n=1}^N \in \mathcal{B}_R^\rho$ , since  $\mathcal{B}_R^\rho \subset \mathcal{B}_R$ , conditions (a)-(e) follows from the above discussion. Let  $\mathbf{Z}^- = \mathbf{U}^- \boldsymbol{\Sigma}^- (\mathbf{V}^-)^\top$  be the singular value decomposition of  $\mathbf{Z}^-$ , where  $\mathbf{U}^- \in \mathbb{R}^{1,1}$ ,  $\mathbf{V}^- \in \mathbb{R}^{N,N}$  are orthogonal and  $\boldsymbol{\Sigma}^- \in \mathbb{R}^{1,N}$  is diagonal. The singular decomposition of  $\mathbf{L}^-$  is given by

$$\begin{aligned} \mathbf{L}^- &= \mathbf{V}^- (\boldsymbol{\Sigma}^-)^\top (\mathbf{U}^-)^\top \mathbf{U}^- \boldsymbol{\Sigma}^- (\mathbf{V}^-)^\top \\ &= \mathbf{V}^- (\boldsymbol{\Sigma}^-)^\top \boldsymbol{\Sigma}^- (\mathbf{V}^-)^\top, \end{aligned} \quad (53)$$

where the diagonal elements of  $(\boldsymbol{\Sigma}^-)^\top \boldsymbol{\Sigma}^-$  indicate the singular values of  $\mathbf{L}^-$ . Hence,  $\|\mathbf{L}^-\|_* = \text{Tr}((\boldsymbol{\Sigma}^-)^\top \boldsymbol{\Sigma}^-)$ . As  $\mathbf{V}^-$  is orthogonal, we have

$$\begin{aligned} \text{Tr}((\boldsymbol{\Sigma}^-)^\top \boldsymbol{\Sigma}^-) &= \text{Tr}((\boldsymbol{\Sigma}^-)^\top \boldsymbol{\Sigma}^- (\mathbf{V}^-)^\top \mathbf{V}^-) \\ &= \text{Tr}(\mathbf{V}^- (\boldsymbol{\Sigma}^-)^\top \boldsymbol{\Sigma}^- (\mathbf{V}^-)^\top) \\ &= \text{Tr}(\mathbf{L}^-). \end{aligned} \quad (54)$$

Hence, we get

$$\begin{aligned} \|\mathbf{L}^-\|_* &= \text{Tr}(\mathbf{L}^-) \\ &= \sum_{n=1}^N (\mathbf{z}_n^-)^\top \mathbf{z}_n^- \\ &= \sum_{n=1}^N \cosh^2 \Delta_{\mathbb{L}^D}(\mathbf{z}_0, \mathbf{z}_n). \end{aligned} \quad (55)$$

Likewise, we have

$$\begin{aligned} \|\mathbf{L}^+\|_* &= \text{Tr}(\mathbf{L}^+) \\ &= \sum_{n=1}^N (\mathbf{z}_n^+)^\top \mathbf{z}_n^+ \\ &= \sum_{n=1}^N \sinh^2 \Delta_{\mathbb{L}^D}(\mathbf{z}_0, \mathbf{z}_n). \end{aligned} \quad (56)$$

By the definition of  $\mathcal{B}_R^\rho$ , we have  $\|\mathbf{L}^+\|_* \leq N \sinh^2 \rho$  and  $\|\mathbf{L}^-\|_* \leq N \cosh^2 \rho$ , which imply condition (f). This completes the proof of the sufficiency in (iii).

(Necessity) (i) Assume that conditions (a)-(d) are satisfied.

Noting that  $\mathbf{L}^- \succeq \mathbf{O}$ , let  $\mathbf{L}^- = \tilde{\mathbf{V}}^- \mathbf{T}^- (\tilde{\mathbf{V}}^-)^\top$  be a singular value decomposition of  $\mathbf{L}^-$ , where  $\tilde{\mathbf{V}}^- \in \mathbb{R}^{N,N}$  is orthogonal and  $\mathbf{T}^-$  is diagonal, that is,  $[\mathbf{T}^-]_{i,j} = 0$  if  $i \neq j$ .

Since  $\text{rank } \mathbf{L}^- = 1$  and  $\mathbf{L}^- \succeq \mathbf{O}$ , we can assume that  $[\mathbf{T}^-]_{1,1} > 0$  and  $[\mathbf{T}^-]_{n,n} = 0$  for all  $n = 2, 3, \dots, N$ .

Therefore,  $[\mathbf{L}^-]_{i,j} = [\tilde{\mathbf{V}}^-]_{i,1} [\mathbf{T}^-]_{1,1} [\tilde{\mathbf{V}}^-]_{i,1}$ , for  $i, j \in$

$[N]$ . In particular,  $[\mathbf{L}^-]_{1,1} = \left( [\tilde{\mathbf{V}}^-]_{1,1} \right)^2 [\mathbf{T}^-]_{1,1}$ . As

$\mathbf{L}^+$  is positive semi-definite, its diagonal entries are all non-negative. In particular,  $[\mathbf{L}^+]_{1,1} \geq 0$ . Since  $[\mathbf{L}^+]_{1,1} - [\mathbf{L}^-]_{1,1} = -1$  from (c), we have  $[\mathbf{L}^-]_{1,1} \geq 1$ . Hence, we have  $[\tilde{\mathbf{V}}^-]_{1,1} \neq 0$ . Define  $\mathbf{V}^-$  by

$$\mathbf{V}^- := \begin{cases} \mathbf{V}^- & \text{if } [\tilde{\mathbf{V}}^-]_{1,1} > 0, \\ -\mathbf{V}^- & \text{if } [\tilde{\mathbf{V}}^-]_{1,1} < 0. \end{cases} \quad (57)$$

Then  $[\mathbf{V}^-]_{1,1} > 0$  and  $\mathbf{L}^- = \mathbf{V}^- \mathbf{T}^- (\mathbf{V}^-)^\top$  is valid. Let

$\mathbf{L}^+ = \mathbf{V}^+ \mathbf{T}^+ (\mathbf{V}^+)^\top$  be a singular value decomposition of  $\mathbf{L}^+$ , where  $\tilde{\mathbf{V}}^+ \in \mathbb{R}^{N,N}$  is orthogonal and  $\mathbf{T}^+$  is diagonal.

Since  $\text{rank } \mathbf{L}^+ \leq D$  and  $\mathbf{L}^+ \succeq \mathbf{O}$ , we can assume that  $[\mathbf{T}^+]_{n,n} = 0$  for all  $n = D+1, D+2, \dots, N$ . Define  $\mathbf{z}_n^- \in \mathbb{R}^1$  and  $\mathbf{z}_n^+ \in \mathbb{R}^D$  by

$$\begin{aligned} \mathbf{z}_n^- &:= [z_{0,n}], \\ \mathbf{z}_n^+ &:= [z_{1,n} \quad z_{2,n} \quad \dots \quad z_{D,n}]^\top, \end{aligned} \quad (58)$$

respectively, where

$$z_{d,n} = \begin{cases} \sqrt{[\mathbf{T}^-]_{1,1} [\mathbf{V}^-]_{n,1}} & \text{if } d = 0, \\ \sqrt{[\mathbf{T}^+]_{d,d} [\mathbf{V}^+]_{n,d}} & \text{if } d = 1, 2, \dots, D. \end{cases} \quad (59)$$

respectively, and define  $\mathbf{Z}^- \in \mathbb{R}^{1,N}$  and  $\mathbf{Z}^+ \in \mathbb{R}^{D,N}$  by

$$\begin{aligned} \mathbf{Z}^- &= [\mathbf{z}_1^- \quad \mathbf{z}_2^- \quad \dots \quad \mathbf{z}_N^-], \\ \mathbf{Z}^+ &= [\mathbf{z}_1^+ \quad \mathbf{z}_2^+ \quad \dots \quad \mathbf{z}_N^+], \end{aligned} \quad (60)$$

respectively. Now, for  $n \in [N]$ , we define  $\mathbf{z}_n \in \mathbb{R}^{1+D}$  by

$$\mathbf{z}_n = \begin{bmatrix} \mathbf{z}_n^- \\ \mathbf{z}_n^+ \end{bmatrix}. \quad (61)$$

The Lorentz Gramian of  $(\mathbf{z}_n)_{n=1}^N$  is given by

$$\begin{aligned} (\mathbf{Z}^+)^{\top} \mathbf{Z}^+ - (\mathbf{Z}^-)^{\top} \mathbf{Z}^- &= \mathbf{V}^+ \mathbf{T}^+ (\mathbf{V}^+)^{\top} - \mathbf{V}^- \mathbf{T}^- (\mathbf{V}^-)^{\top} \\ &= \mathbf{L}^+ - \mathbf{L}^-. \end{aligned} \quad (62)$$

In the following, we prove  $\mathbf{z}_n \in \mathbb{L}^D$  for all  $n \in [N]$ . Since  $\langle \mathbf{z}_n, \mathbf{z}_n \rangle_{\mathbb{M}} = [\mathbf{L}]_{n,n} = [\mathbf{L}^+ - \mathbf{L}^-]_{n,n} = -1$ , it is sufficient to prove that  $z_{0,n} > 0$ . From  $[\mathbf{V}^-]_{1,1} > 0$  and  $z_{0,n} = \sqrt{[\mathbf{T}^-]_{1,1}} [\mathbf{V}^-]_{n,1}$ , we have  $z_{0,1} > 0$ . For general  $n \in [N]$ , the following is valid:

$$\begin{aligned} |z_{0,1}| |z_{0,n}| - z_{0,1} z_{0,n} &> \|\mathbf{z}_1^+\|_2 \|\mathbf{z}_n^+\|_2 - z_{0,1} z_{0,n} \\ &\geq (\mathbf{z}_1^+)^{\top} \mathbf{z}_n^+ - z_{0,1} z_{0,n} \\ &= -\langle \mathbf{z}_1, \mathbf{z}_n \rangle_{\mathbb{M}} \\ &= [\mathbf{L}]_{1,n} \\ &= [\mathbf{L}^+ - \mathbf{L}^-]_{1,n} \\ &\geq 1 \\ &> 0. \end{aligned} \quad (63)$$

Therefore,  $z_{0,1}$  and  $z_{0,n}$  must have the same sign. Hence,  $z_{0,n} > 0$ , which completes the proof of the necessity in (i).

(ii) Assume that conditions **(a)-(e)** are satisfied. Define  $(\mathbf{z}_n)_{n=1}^N$  as in (58). Then, since **(a)-(d)** are satisfied,  $(\mathbf{z}_n)_{n=1}^N \in (\mathbb{L}^D)^N$  and its Lorentz Gramian is  $\mathbf{L} = \mathbf{L}^+ - \mathbf{L}^-$ . Thus, it suffices to show that condition **(e)** implies that  $\Delta_{\mathbb{L}^D}(\mathbf{z}_0, \mathbf{z}_N) \leq R$  is valid for all  $n \in N$ . Since  $[\mathbf{L}^-]_{n,n} = (z_{0,n})^2 = \cosh^2 \Delta_{\mathbb{L}^D}(\mathbf{z}_0, \mathbf{z}_N)$ , condition **(e)** implies  $\cosh^2 \Delta_{\mathbb{L}^D}(\mathbf{z}_0, \mathbf{z}_N) \leq \cosh^2 R$ , which is equivalent to  $\Delta_{\mathbb{L}^D}(\mathbf{z}_0, \mathbf{z}_N) \leq R$ . Hence, we have  $(\mathbf{z}_n)_{n=1}^N \in \mathcal{B}_R$ .

(iii) Assume that conditions **(a)-(f)** are satisfied. Define  $(\mathbf{z}_n)_{n=1}^N$  as in (58). Then, since **(a)-(e)** are satisfied,  $(\mathbf{z}_n)_{n=1}^N \in \mathcal{B}_R$  and its Lorentz Gramian is  $\mathbf{L} = \mathbf{L}^+ - \mathbf{L}^-$ . Also, condition **(f)** implies  $\frac{1}{N} \sum_{n=1}^N \cosh^2 \Delta_{\mathbb{L}^D}(\mathbf{z}_0, \mathbf{z}_n) \leq \cosh^2 \rho$ , since the left hand side is given by  $\frac{1}{N} \|\mathbf{L}^-\|_*$ .  $\square$

**Remark 3.** The statement of Lemma 9 (i) is equivalent to that of Proposition 1 in (Tabaghi & Dokmanic, 2020). However, the proof there does not consider the case where the representations given by the decomposition of the Lorentz Gramian are all in  $-\mathbb{L}^D$  instead of  $\mathbb{L}^D$ . The above construction of representations solves this problem by forcing  $z_{0,n}$  to be positive.

## F. Rademacher Complexity and Proof of Theorem 1

First, we define Rademacher complexity (Koltchinskii, 2001; Koltchinskii & Panchenko, 2000; Bartlett et al., 2002), the key tool to obtain HOE's generalization error bound. Let  $\mathcal{T}$  be our input space and  $\mathcal{H} \subset \{h|h: \mathcal{T} \rightarrow \mathbb{R}\}$  be our hypothesis space. Let  $S \in \mathbb{Z}_{\geq 0}$  be the number of data points, and suppose that data points  $(t_1, y_1), (t_2, y_2), \dots, (t_S, y_S) \in \mathcal{T} \times \{-1, +1\}$  are independently distributed according to some unknown fixed distribution  $\mu$ . The Rademacher complexity of  $h$  is defined as follows:

**Definition 3.** Let  $\sigma_1, \sigma_2, \dots, \sigma_S$  be random values such that  $\sigma_1, \sigma_2, \dots, \sigma_S, (t_1, y_1), (t_2, y_2), \dots, (t_S, y_S)$  are mutually independent and each of  $\sigma_1, \sigma_2, \dots, \sigma_S$  takes values  $\{-1, +1\}$  with equal probability. The Rademacher complexity  $\mathfrak{R}_S(\mathcal{H})$  is defined by

$$\mathfrak{R}_S(\mathcal{H}) := \mathbb{E}_{(t_s)_{s=1}^S} \mathbb{E}_{(\sigma_s)_{s=1}^S} \left[ \frac{1}{S} \sup_{h \in \mathcal{H}} \sum_{s=1}^S \sigma_s h(t_s) \right]. \quad (64)$$

We use the following theorem provided by Bartlett & Mendelson (2002) and arranged by Kakade et al. (2008).

**Theorem 10** ((Bartlett & Mendelson, 2002; Kakade et al., 2008)). *Let  $\phi: \mathcal{T} \times \{-1, +1\} \rightarrow \mathbb{R}$  be a loss function. Define the empirical risk function  $\hat{\mathcal{R}}_S(h)$  and expected risk function  $\mathcal{R}(h)$  by*

$$\begin{aligned} \hat{\mathcal{R}}_S(h) &:= \frac{1}{S} \sum_{s=1}^S \phi(h(t_s), y_s), \\ \mathcal{R}(h) &:= \mathbb{E}_{t,y} \phi(h(t), y). \end{aligned} \quad (65)$$

Assume that  $\phi(\cdot, -1)$  and  $\phi(\cdot, +1)$  are  $L_\phi$ -Lipschitz and bounded. Define

$$c_\phi := \sup_{\substack{t \in \mathcal{T}, \\ y \in \{-1, +1\}, \\ h \in \mathcal{H}}} \phi(h(t), y) - \inf_{\substack{t \in \mathcal{T}, \\ y \in \{-1, +1\}, \\ h \in \mathcal{H}}} \phi(h(t), y). \quad (66)$$

Then for any  $\delta \in \mathbb{R}_{>0}$  and with probability at least  $1 - \delta$  simultaneously for all  $h \in \mathcal{H}$  we have that

$$\mathcal{R}(h) - \hat{\mathcal{R}}_S(h) \leq 2\mathfrak{R}_S(\mathcal{H}) + c_\phi \sqrt{\frac{\ln(1/\delta)}{2S}}. \quad (67)$$

From this theorem, we can easily derive an upper bound for the excess risk of the empirical risk minimizer as follows.

**Corollary 11.** *Define the empirical risk minimizer  $\hat{h} \in \mathcal{H}$  and expected loss minimizer by  $h^* \in \mathcal{H}$  by*

$$\hat{h} := \operatorname{argmin}_{h \in \mathcal{H}} \hat{\mathcal{R}}_S(h), \quad h^* := \operatorname{argmin}_{h \in \mathcal{H}} \mathcal{R}(h), \quad (68)$$

and we call  $\mathcal{R}(\hat{h}) - \mathcal{R}(h^*)$  the excess risk of  $\hat{h}$ . Then for any  $\delta \in \mathbb{R}_{>0}$  and with probability at least  $1 - \delta$  we have that

$$\mathcal{R}(\hat{h}) - \mathcal{R}(h^*) \leq 2\mathfrak{R}_S(\mathcal{H}) + 2c_\phi \sqrt{\frac{\ln(2/\delta)}{2S}}. \quad (69)$$

*Proof.* We have that

$$\begin{aligned} & \mathcal{R}(\hat{h}) - \mathcal{R}(h^*) \\ &= \left( \mathcal{R}(\hat{h}) - \hat{\mathcal{R}}_S(\hat{h}) \right) + \left( \hat{\mathcal{R}}_S(\hat{h}) - \hat{\mathcal{R}}_S(h^*) \right) \\ & \quad + \left( \hat{\mathcal{R}}_S(h^*) - \mathcal{R}(h^*) \right) \\ & \leq \left( \mathcal{R}(\hat{h}) - \hat{\mathcal{R}}_S(\hat{h}) \right) + \left( \hat{\mathcal{R}}_S(h^*) - \mathcal{R}(h^*) \right), \end{aligned} \quad (70)$$

where the last inequality holds from the definition of  $\hat{h}$ . We complete the proof by evaluating the first and second term by Theorem 10 and Hoeffding's inequality, respectively.  $\square$

Therefore, it suffices to obtain the upper bound of HOE model's Rademacher complexity, which is given below. Let  $\mathcal{B} \subset \mathbb{L}^D$ . We define a hypothesis function class  $h(\cdot; \mathcal{B})$  by

$$h(\cdot; \mathcal{B}) := \left\{ h(\cdot; (\mathbf{z}_n)_{n=1}^N) \mid (\mathbf{z}_n)_{n=1}^N \in \mathcal{B} \right\}. \quad (71)$$

We evaluate the Rademacher complexity of the hypothesis function class  $h(\cdot; \mathcal{B}^\rho)$  defined by

$$\begin{aligned} & \mathfrak{R}_S(h(\cdot; \mathcal{B}^\rho)) \\ &:= \mathbb{E}_{(i,j,k)} \mathbb{E}_\sigma \left[ \sup_{(\mathbf{z}_n)_{n=1}^N \in \mathcal{B}^\rho} \frac{1}{S} \sum_{s=1}^S \sigma_s h(i_s, j_s, k_s; (\mathbf{z}_n)_{n=1}^N) \right]. \end{aligned} \quad (72)$$

The following evaluates the complexity.

**Lemma 12.** *The Rademacher complexity of the hypothesis function class  $h(\cdot; \mathcal{B}^\rho)$  satisfies the following inequality:*

$$\begin{aligned} & \mathfrak{R}_S(h(\cdot; \mathcal{B}^\rho)) \\ & \leq (\cosh^2 \rho + \sinh^2 \rho) \left( \sqrt{\frac{2N \ln N}{S}} + \frac{N \ln N}{6S} \right). \end{aligned} \quad (73)$$

*Proof.* Define  $\mathcal{G}_R^-, \mathcal{G}_R^+, \bar{\mathcal{G}}_R^-, \bar{\mathcal{G}}_R^+ \subset \mathbb{S}^{N,N}$  by

$$\begin{aligned} \mathcal{G}^\rho &:= \{ \mathbf{L}^+ - \mathbf{L}^- \mid \mathbf{L}^-, \mathbf{L}^+ \in \mathbb{S}^{N,N} \text{ satisfy (a)-(d), (f)} \}, \\ \bar{\mathcal{G}}^\rho &:= \{ \mathbf{L}^+ - \mathbf{L}^- \mid \mathbf{L}^- \in \mathcal{Q}^{N \cosh^2 \rho}, \mathbf{L}^+ \in \mathcal{Q}^{N \sinh^2 \rho} \}, \end{aligned} \quad (74)$$

where (a)-(f) are the conditions defined in Lemma 9, and for  $\lambda \in \mathbb{R}_{\geq 0}$ ,  $\mathcal{Q}^\lambda$  is defined by

$$\mathcal{Q}^\lambda := \{ \mathbf{L} \in \mathbb{S}^{N,N} \mid \mathbf{L} \succeq \mathbf{O}, \|\mathbf{L}\|_* \leq \lambda \}. \quad (75)$$

Note that  $\mathcal{G}_R^\rho \subset \bar{\mathcal{G}}^\rho$ . Let  $\sigma_1, \sigma_2, \dots, \sigma_S$  be i.i.d Rademacher random variables and  $\boldsymbol{\sigma} = [\sigma_1 \ \sigma_2 \ \dots \ \sigma_S]^\top$ . The Rademacher complexity is calculated as follows:

$$\begin{aligned} & \mathfrak{R}_S(h(\cdot; \mathcal{B}^\rho)) \\ &:= \mathbb{E}_{(i,j,k)} \mathbb{E}_\sigma \left[ \sup_{(\mathbf{z}_n)_{n=1}^N \in \mathcal{B}^\rho} \frac{1}{S} \sum_{s=1}^S \sigma_s h(i_s, j_s, k_s; (\mathbf{z}_n)_{n=1}^N) \right] \\ &= \mathbb{E}_{(i,j,k)} \mathbb{E}_\sigma \left[ \sup_{\mathbf{L} \in \mathcal{G}^\rho} \frac{1}{S} \sum_{s=1}^S \sigma_s \langle \mathbf{L}, \mathbf{T}_{i_s, j_s, k_s} \rangle_{\mathbb{F}} \right] \\ &\leq \mathbb{E}_{(i,j,k)} \mathbb{E}_\sigma \left[ \sup_{\mathbf{L} \in \bar{\mathcal{G}}^\rho} \frac{1}{S} \sum_{s=1}^S \sigma_s \langle \mathbf{L}, \mathbf{T}_{i_s, j_s, k_s} \rangle_{\mathbb{F}} \right], \end{aligned} \quad (76)$$

where the last inequality results from  $\mathcal{G}_R^\rho \subset \bar{\mathcal{G}}^\rho$ . We can decompose the integrand of the above expectation operator as follows:

$$\begin{aligned} & \sup_{\mathbf{L} \in \bar{\mathcal{G}}^\rho} \frac{1}{S} \sum_{s=1}^S \sigma_s \langle \mathbf{L}, \mathbf{T}_{i_s, j_s, k_s} \rangle_{\mathbb{F}} \\ &= \sup_{\substack{\mathbf{L}^- \in \mathcal{Q}^{N \sinh^2 \rho}, \\ \mathbf{L}^+ \in \mathcal{Q}^{N \cosh^2 \rho}}} \frac{1}{S} \sum_{s=1}^S \sigma_s \langle \mathbf{L}^+ - \mathbf{L}^-, \mathbf{T}_{i_s, j_s, k_s} \rangle_{\mathbb{F}} \\ &\leq \sup_{\mathbf{L}^+ \in \mathcal{Q}^{N \sinh^2 \rho}} \frac{1}{S} \sum_{s=1}^S \sigma_s \langle \mathbf{L}^+, \mathbf{T}_{i_s, j_s, k_s} \rangle_{\mathbb{F}} \\ & \quad + \sup_{\mathbf{L}^- \in \mathcal{Q}^{N \cosh^2 \rho}} \frac{1}{S} \sum_{s=1}^S \sigma_s \langle \mathbf{L}^-, \mathbf{T}_{i_s, j_s, k_s} \rangle_{\mathbb{F}}. \end{aligned} \quad (77)$$

Hence, we have

$$\begin{aligned} & \mathfrak{R}_S(h(\cdot; \mathcal{B}^\rho)) \\ & \leq \mathfrak{R}_S^{\mathcal{G}}(\langle \mathcal{Q}^{N \sinh^2 \rho}, \cdot \rangle_{\mathbb{F}}) + \mathfrak{R}_S^{\mathcal{G}}(\langle \mathcal{Q}^{N \cosh^2 \rho}, \cdot \rangle_{\mathbb{F}}), \end{aligned} \quad (78)$$

where  $\mathfrak{R}_S^{\mathcal{G}}(\langle \mathcal{Q}^\lambda, \cdot \rangle_{\mathbb{F}})$  is defined as

$$\mathbb{E}_{(i,j,k)} \mathbb{E}_\sigma \left[ \sup_{\mathbf{L} \in \mathcal{Q}^\lambda} \frac{1}{S} \sum_{s=1}^S \sigma_s \langle \mathbf{L}, \mathbf{T}_{i_s, j_s, k_s} \rangle_{\mathbb{F}} \right]. \quad (79)$$

We can bound  $\mathfrak{R}_S^{\mathcal{G}}(\langle \mathcal{Q}^\lambda, \cdot \rangle_{\mathbb{F}})$  by the following lemma.

**Lemma 13.**

$$\mathfrak{R}_S^{\mathcal{G}}(\langle \mathcal{Q}^\lambda, \cdot \rangle_{\mathbb{F}}) \leq \frac{\lambda}{N} \left( \sqrt{\frac{2(N+1) \ln N}{S}} + \frac{N \ln N}{\sqrt{12}S} \right). \quad (80)$$

We prove Lemma 13 later. By Lemma 13, we obtain

$$\begin{aligned} & \mathfrak{R}_S(h(\cdot; \mathcal{B}^\rho)) \\ & \leq (\cosh^2 \rho + \sinh^2 \rho) \left( \sqrt{\frac{2(N+1) \ln N}{S}} + \frac{N \ln N}{\sqrt{12S}} \right), \end{aligned} \quad (81)$$

which completes the proof.  $\square$

*Proof of Lemma 13.* For  $\lambda \in \mathbb{R}_{\geq 0}$ , define  $\mathcal{Q}_1^\lambda$  by

$$\{\lambda \mathbf{u} \mathbf{u}^\top \mid \mathbf{u} \in \mathbb{R}^N, \|\mathbf{u}\|_2 = 1\}. \quad (82)$$

Since  $\mathcal{Q}_1^\lambda$  is the convex hull of  $\mathcal{Q}^\lambda$  and the Rademacher complexity of a function class equals that of its convex hull (Bartlett & Mendelson, 2002, Theorem 12-2), we have that

$$\begin{aligned} & \mathfrak{R}_S^G(\langle \mathcal{Q}^\lambda, \cdot \rangle_F) \\ & = \mathfrak{R}_S^G(\langle \mathcal{Q}_1^\lambda, \cdot \rangle_F) \\ & = \mathbb{E}_{(i,j,k)} \mathbb{E}_\sigma \left[ \sup_{\|\mathbf{u}\|_2 \leq 1} \frac{1}{S} \sum_{s=1}^S \sigma_s \langle \lambda \mathbf{u} \mathbf{u}^\top, \mathbf{T}_{i_s, j_s, k_s} \rangle_F \right] \\ & = \mathbb{E}_{(i,j,k)} \mathbb{E}_\sigma \left[ \sup_{\|\mathbf{u}\|_2 \leq 1} \frac{1}{S} \sum_{s=1}^S \sigma_s \lambda \text{Tr}(\mathbf{u} \mathbf{u}^\top \mathbf{T}_{i_s, j_s, k_s}) \right] \\ & = \frac{\lambda}{S} \mathbb{E}_{(i,j,k)} \mathbb{E}_\sigma \left[ \sup_{\|\mathbf{u}\|_2 \leq 1} \sum_{s=1}^S \sigma_s \text{Tr}(\mathbf{u}^\top \mathbf{T}_{i_s, j_s, k_s} \mathbf{u}) \right] \\ & = \frac{\lambda}{S} \mathbb{E}_{(i,j,k)} \mathbb{E}_\sigma \left[ \sup_{\|\mathbf{u}\|_2 \leq 1} \text{Tr} \left( \mathbf{u}^\top \left( \sum_{s=1}^S \sigma_s \mathbf{T}_{i_s, j_s, k_s} \right) \mathbf{u} \right) \right] \\ & = \frac{\lambda}{S} \mathbb{E}_{(i,j,k)} \mathbb{E}_\sigma \left[ \left\| \sum_{s=1}^S \sigma_s \mathbf{T}_{i_s, j_s, k_s} \right\|_{\text{op},2} \right], \end{aligned} \quad (83)$$

where  $\|\cdot\|_{\text{op},2}$  denotes the operator norm with respect to the 2-norm defined by

$$\|\mathbf{A}\|_{\text{op},2} := \max_{\|\mathbf{u}\|_2 \leq 1} \|\mathbf{A}\mathbf{u}\|_2 \quad (84)$$

To evaluate this, we can apply the following the matrix Bernstein inequality.

**Theorem 14** ((Tropp, 2015) Theorem 6.6.1). *Let  $\mathbf{A}_1, \mathbf{A}_2, \dots, \mathbf{A}_S \in \mathbb{S}^{N,N}$  be independent random matrices that satisfies*

$$\mathbb{E} \mathbf{A}_s = \mathbf{O}, \quad \|\mathbf{A}_s\|_{\text{op},2} \leq \sigma. \quad (85)$$

Then

$$\mathbb{E} \left\| \sum_{s=1}^S \mathbf{A}_s \right\|_{\text{op},2} \leq \sqrt{2v \left( \sum_{s=1}^S \mathbf{A}_s \right) \ln N} + \frac{1}{3} \sigma \ln N, \quad (86)$$

where  $v$  is the matrix variance statistics defined by

$$v(\mathbf{A}) := \|\mathbb{E} \mathbf{A}^2\|_{\text{op},2}. \quad (87)$$

Note that  $v \left( \sum_{s=1}^S \mathbf{A}_s \right) = \left\| \sum_{s=1}^S \mathbb{E} \mathbf{A}_s^2 \right\|_{\text{op},2}$  is valid since

$\mathbf{A}_1, \mathbf{A}_2, \dots, \mathbf{A}_S \in \mathbb{S}^{N,N}$  are independent. We apply Theorem 14 to the right hand side of (83) by substituting  $\mathbf{A}_s$  by  $\sigma_s \mathbf{T}_{i_s, j_s, k_s}$ . Here,  $\mathbb{E} \sigma_s \mathbf{T}_{i_s, j_s, k_s} = \mathbf{O}$  is valid because  $\mathbb{E} \sigma_s = 0$ . The singular values of  $\sigma_s \mathbf{T}_{i_s, j_s, k_s}$  is equal to those of  $\sigma_s \tilde{\mathbf{T}}$ , where

$$\tilde{\mathbf{T}} := \begin{bmatrix} 0 & -\frac{1}{2} & +\frac{1}{2} \\ -\frac{1}{2} & 0 & 0 \\ +\frac{1}{2} & 0 & 0 \end{bmatrix}. \quad (88)$$

Since

$$\left( \sigma_s \tilde{\mathbf{T}} \right)^2 = \left( \sigma_s \tilde{\mathbf{T}} \right)^\top \left( \sigma_s \tilde{\mathbf{T}} \right) = \begin{bmatrix} +\frac{1}{2} & 0 & 0 \\ 0 & +\frac{1}{4} & -\frac{1}{4} \\ 0 & -\frac{1}{4} & +\frac{1}{4} \end{bmatrix}, \quad (89)$$

and its eigenvalues are  $0, +\frac{1}{2}, +\frac{1}{2}$ , the singular values of  $\tilde{\mathbf{T}}$  are  $0, +\frac{1}{\sqrt{2}}, +\frac{1}{\sqrt{2}}$ . Hence, we have that  $\|\sigma_s \mathbf{T}_{i_s, j_s, k_s}\|_{\text{op},2} \leq \frac{1}{\sqrt{2}}$ . Lastly, we evaluate  $\left\| \sum_{s=1}^S \mathbb{E} (\sigma_s \mathbf{T}_{i_s, j_s, k_s})^2 \right\|_{\text{op},2} = S \|\mathbb{E} \mathbf{T}_{i_s, j_s, k_s}^2\|_{\text{op},2}$ . In general, since  $\|\cdot\|_{\text{op},2}$  is a convex function, we have that  $\|\mathbb{E} \mathbf{T}_{i_s, j_s, k_s}^2\|_{\text{op},2} \leq \mathbb{E} \|\mathbf{T}_{i_s, j_s, k_s}^2\|_{\text{op},2} = \frac{1}{2}$ .

The diagonal elements and off-diagonal elements of  $\mathbb{E} \mathbf{T}_{i_s, j_s, k_s}^2$  are all  $\frac{1}{N}$  and all  $-\frac{1}{2} \frac{1}{N(N-1)}$ , respectively, because the sum of the diagonal elements and that of the off-diagonal elements in  $\mathbf{T}_{i_s, j_s, k_s}$  are always 1 and  $-\frac{1}{2}$ , respectively, and from the symmetry among the  $N$  diagonal elements and  $N(N-1)$  off-diagonal elements. Hence, we have  $\mathbb{E} \mathbf{T}_{i_s, j_s, k_s}^2 = \left( \frac{1}{N} + \frac{1}{2} \frac{1}{N(N-1)} \right) \mathbf{I} - \frac{1}{2} \frac{1}{N(N-1)} \mathbf{1} \mathbf{1}^\top$ , whose eigenvalues (singular values) are  $\frac{1}{N} + \frac{1}{2} \frac{1}{N(N-1)}$  (multiplicity  $N-1$ ) and  $\frac{1}{N}$  (multiplicity 1). Thus, we have

$$\begin{aligned} v \left( \sum_{s=1}^S \sigma_s \mathbf{T}_{i_s, j_s, k_s} \right) & = S \|\mathbb{E} \mathbf{T}_{i_s, j_s, k_s}^2\|_{\text{op},2} \\ & = S \left( \frac{1}{N} + \frac{1}{2} \frac{1}{N(N-1)} \right) \\ & = \frac{S}{2} \left( \frac{1}{N-1} + \frac{1}{N} \right) \\ & = \frac{S}{2} \frac{1}{N^2} \left( \frac{N^2}{N-1} + N \right) \\ & \leq \frac{S}{N^2} (N+1) \end{aligned} \quad (90)$$

. Therefore we have

$$\begin{aligned} & \mathbb{E}_{(i,j,k)} \mathbb{E}_\sigma \left[ \left\| \sum_{s=1}^S \sigma_s \mathbf{T}_{i_s, j_s, k_s} \right\|_{\text{op},2} \right] \\ & \leq \frac{1}{N} \sqrt{2S(N+1) \ln N} + \frac{1}{3} \cdot \frac{1}{\sqrt{2}} \ln N, \end{aligned} \quad (91)$$

which completes the proof.  $\square$

*Proof of Theorem 1.* We complete the proof by applying Corollary 11 to Lemma 12.  $\square$
